# Supplementary material
Source: PubMed Central journal article supplement (PMC8178175)
Supplement: NIHMS1674711-supplement-Supplementary_Figs_1-2_and_Supplementary_Tables_1-7.pdf [file NIHMS1674711-supplement-Supplementary_Figs_1-2_and_Supplementary_Tables_1-7.pdf]

Supplemental Figure 1. Flowchart for participant selection for analytic data set.

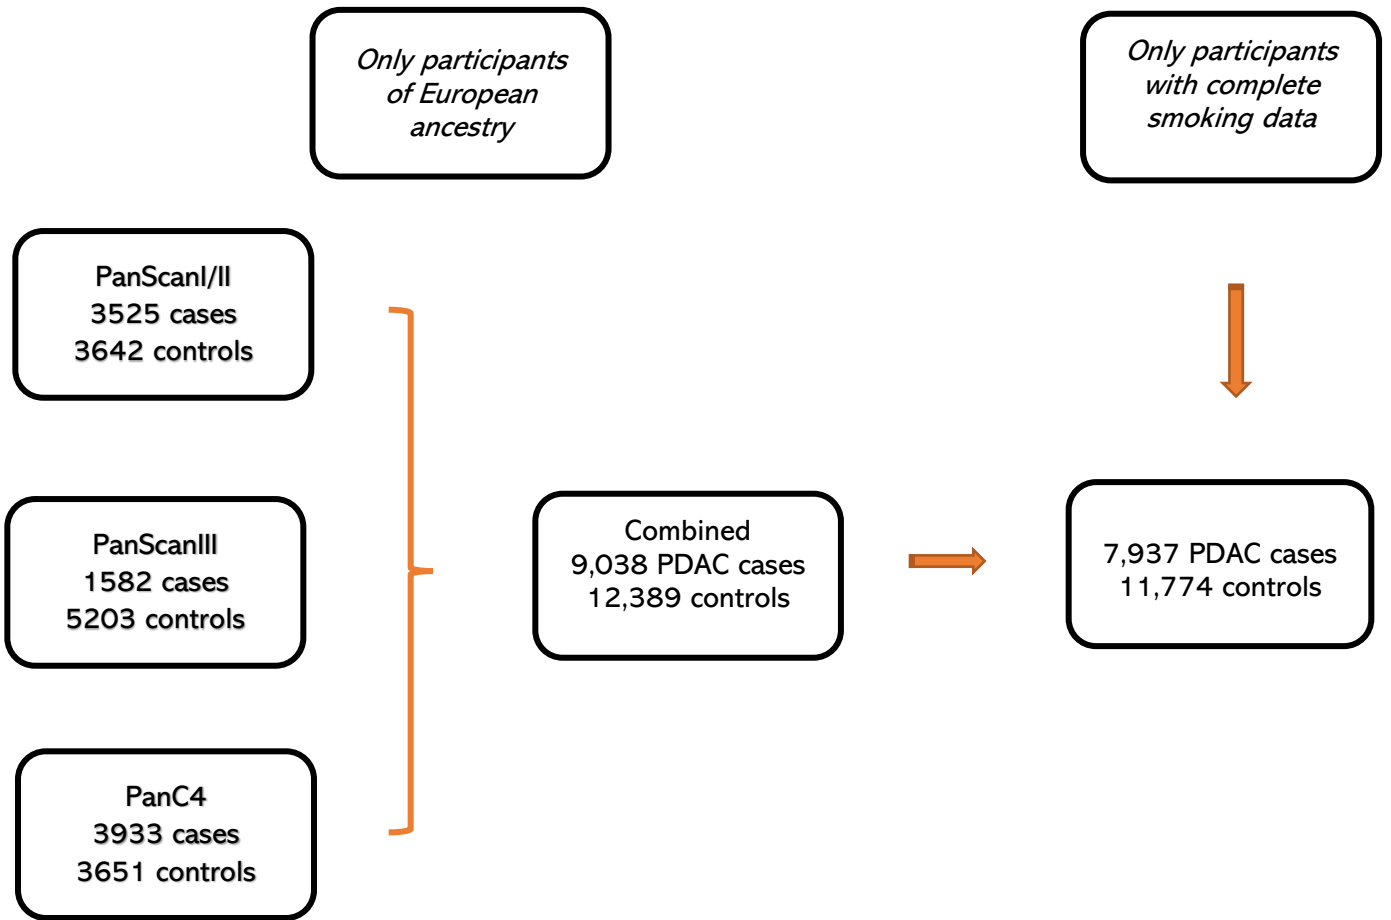

Abbreviations: PDAC: pancreatic ductal adenocarcinoma

Klein A, Wolpin BM, Risch HA, Stolzenberg-Solomon RZ, Mocci E, Zhang M, *et al.* Genome-wide meta-analysis identifies five new susceptibility loci for pancreatic cancer. *Nat Comm* **2018**.

Supplemental table 1. Case and control count by study phase

| Study                              | PanScan1/2  |             | PanScan3    |             | PanC4       |             | Total       |              |
|------------------------------------|-------------|-------------|-------------|-------------|-------------|-------------|-------------|--------------|
|                                    | Case        | Control     | Case        | Control     | Case        | Control     | Case        | Control      |
| <b>Cohorts</b>                     |             |             |             |             |             |             |             |              |
| AgHealth                           |             |             | 23          | 0           |             |             | 23          | 0            |
| ATBC                               | 194         | 206         | 44          | 217         |             |             | 238         | 423          |
| CLUE II                            | 67          | 70          |             |             |             |             | 67          | 70           |
| CPS II                             | 107         | 112         | 146         | 105         |             |             | 253         | 217          |
| EPIC                               | 83          | 86          |             |             |             |             | 83          | 86           |
| Denmark                            |             |             |             |             |             |             |             |              |
| EPIC IARC                          | 216         | 228         | 150         | 256         |             |             | 366         | 484          |
| EPIC Umea                          | 79          | 98          | 19          | 0           |             |             | 98          | 98           |
| HPFS                               | 52          | 49          | 23          | 84          |             |             | 75          | 133          |
| MCCS                               |             |             | 34          | 75          |             |             | 34          | 75           |
| MEC                                |             |             | 27          | 198         |             |             | 27          | 198          |
| NHS                                | 81          | 82          | 29          | 436         |             |             | 110         | 518          |
| NYU-WHS                            | 6           | 11          |             |             |             |             | 6           | 11           |
| PHS                                | 43          | 56          | 13          | 0           |             |             | 56          | 56           |
| PLCO                               | 176         | 205         | 91          | 3042        |             |             | 267         | 3247         |
| SELECT                             |             |             | 54          | 0           |             |             | 54          | 0            |
| VITAL                              |             |             | 47          | 0           |             |             | 47          | 0            |
| WHI                                | 206         | 207         | 166         | 222         |             |             | 372         | 429          |
| WHS                                | 23          | 33          |             |             |             |             | 23          | 33           |
| <b>Case-control or case series</b> |             |             |             |             |             |             |             |              |
| DFCI                               |             |             | 356         | 0           |             |             | 356         | 0            |
| JHU                                | 173         | 137         |             |             | 216         | 58          | 389         | 195          |
| MAYO                               | 635         | 612         |             |             | 755         | 866         | 1390        | 1478         |
| MDA                                | 256         | 266         |             |             | 550         | 471         | 806         | 737          |
| MSKCC                              | 126         | 134         |             |             | 252         | 116         | 378         | 250          |
| Spain                              |             |             | 95          | 397         |             |             | 95          | 397          |
| Toronto                            | 257         | 259         |             |             | 351         | 350         | 608         | 609          |
| UCSF                               | 198         | 199         |             |             | 208         | 204         | 406         | 403          |
| Yale                               | 198         | 271         |             |             | 132         | 329         | 330         | 600          |
| Queenland                          |             |             |             |             | 534         | 585         | 534         | 585          |
| IARC                               |             |             |             |             | 446         | 442         | 446         | 442          |
| <b>Total</b>                       | <b>3176</b> | <b>3321</b> | <b>1317</b> | <b>5032</b> | <b>3444</b> | <b>3421</b> | <b>7937</b> | <b>11774</b> |

Supplemental figure 2. Q-Q and Manhattan plots for the CML and UML methods

Q-Q plot for CML interaction p-values

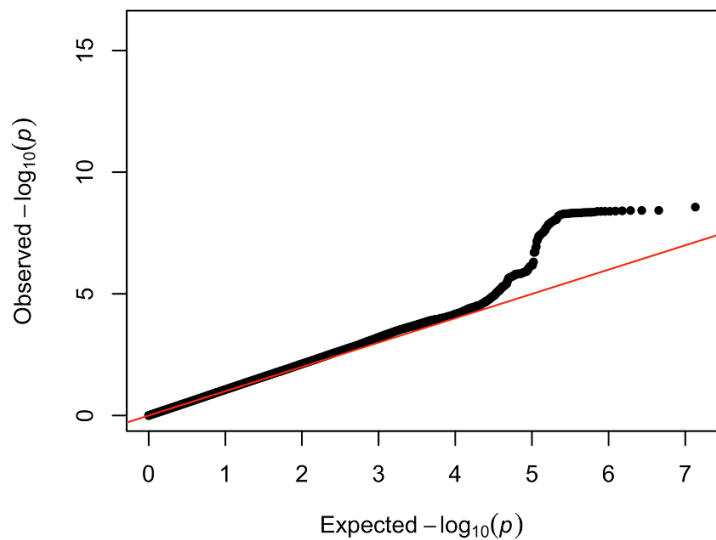

Manhattan plot for CML interaction p-values

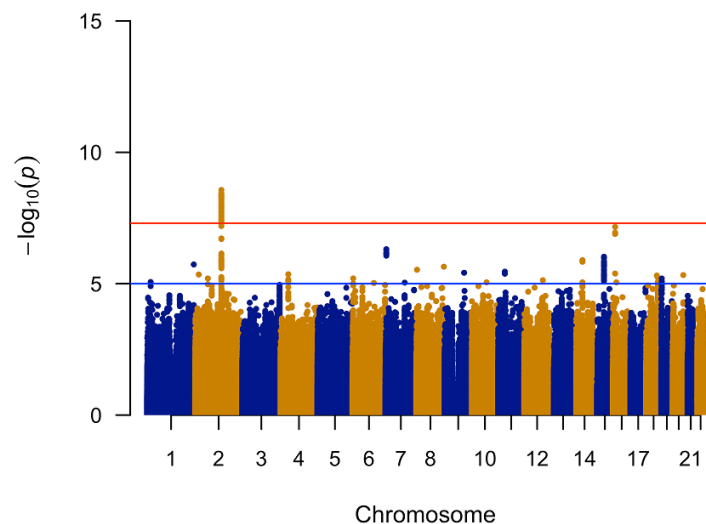

Q-Q plot for UML interaction p-values

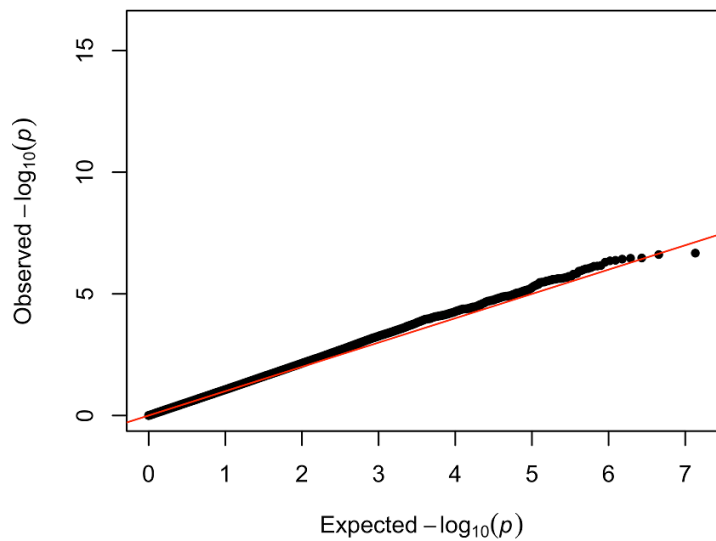

Manhattan plot for UML interaction p-values

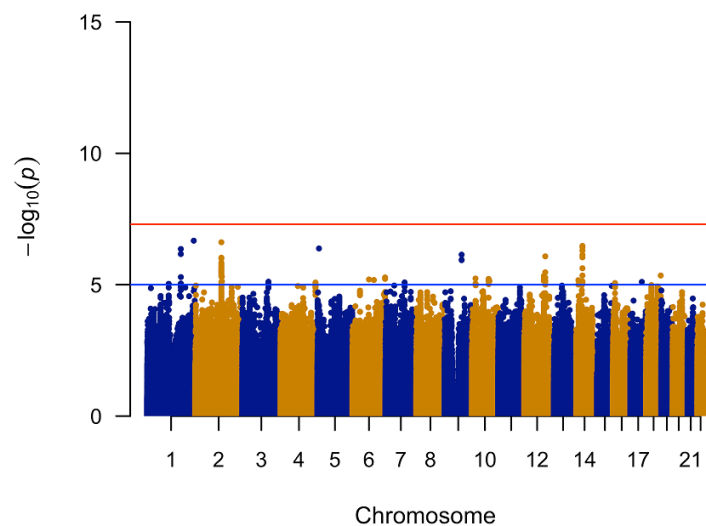

Supplemental table 2. Top-1 SNP for locus 2q21.3 with association reaching genome wide significance

| Chr<br>BP<br>SNP<br>A1/A2<br>Gene                                            | Dataset           | Info  | MAF  | Statistic<br>Method | OR_SNP<br>(95%CI)   | OR_SNP*For<br>mer_Smoker<br>(95%CI) | ORSNP*Curr<br>ent_Smoker<br>(95%CI) | Interaction<br>P-value |
|------------------------------------------------------------------------------|-------------------|-------|------|---------------------|---------------------|-------------------------------------|-------------------------------------|------------------------|
| 2q21.3<br><br>135356285<br>rs1818613<br><br>G/T<br><br>TMEM163<br>(intronic) | Meta-<br>Analysis |       |      | CML                 | 0.87<br>(0.81,0.92) | 1.11<br>(1.04,1.18)                 | 1.33<br>(1.24,1.42)                 | 2.70E-09               |
|                                                                              |                   |       |      | EB                  | 0.87<br>(0.81,0.93) | 1.13<br>(1.04,1.23)                 | 1.35<br>(1.25,1.44)                 | 3.08E-09               |
|                                                                              |                   |       |      | UML                 | 0.89<br>(0.83,0.96) | 1.11<br>(1.02,1.21)                 | 1.4<br>(1.27,1.52)                  | 1.02E-06               |
|                                                                              | PanScan           | 0.99  | 0.39 | CML                 | 0.88<br>(0.8,0.95)  | 1.14<br>(1.04,1.23)                 | 1.39<br>(1.26,1.51)                 | 8.22E-07               |
|                                                                              |                   |       |      | EB                  | 0.9<br>(0.81,0.99)  | 1.11<br>(0.99,1.23)                 | 1.39<br>(1.27,1.51)                 | 1.01E-06               |
|                                                                              |                   |       |      | UML                 | 0.92<br>(0.83,1.01) | 1.07<br>(0.95,1.2)                  | 1.41<br>(1.25,1.57)                 | 1.24E-04               |
|                                                                              | PanC4             | 0.984 | 0.39 | CML                 | 0.85<br>(0.76,0.94) | 1.08<br>(0.98,1.19)                 | 1.27<br>(1.13,1.4)                  | 2.49E-03               |
|                                                                              |                   |       |      | EB                  | 0.85<br>(0.76,0.94) | 1.13<br>(0.98,1.28)                 | 1.28<br>(1.13,1.43)                 | 4.96E-03               |
|                                                                              |                   |       |      | UML                 | 0.86<br>(0.75,0.96) | 1.17<br>(1.02,1.32)                 | 1.32<br>(1.12,1.53)                 | 1.30E-02               |

Abbreviations: Chr, chromosome; BP, base pair position according to the human genome Build 37; A1, effect allele (minor allele); A2, alternative allele (major allele)  
Info, imputation quality score; MAF, minor allele frequency; CML, Constrained maximum-likelihood; EB, Empirical Bayes; UML Unconstrained maximum-likelihood; OR (95%CI), odds ratios and confidence intervals.

**Supplemental Table 3. Top-1 SNP for locus 2q21.3 association by study phase and study design**

| Chr<br>BP<br>SNP<br>A1/A2<br>Gene | Dataset             | MAF       | Statistic<br>Method | OR_SNP (95%CI)    | OR_SNP*Former_Smoker<br>(95%CI) | ORSNP*Current_Smoker<br>(95%CI) | Interaction<br>P-value |
|-----------------------------------|---------------------|-----------|---------------------|-------------------|---------------------------------|---------------------------------|------------------------|
| 2q21.3<br><br>135356285           | <b>PanScan I</b>    | 0.36/0.64 | <b>CML</b>          | 0.87 (0.76, 1.00) | 1.23 (1.05, 1.45)               | 1.52 (1.25, 1.85)               | 1.06E-04               |
|                                   |                     |           | <b>EB</b>           | 0.89 (0.76, 1.03) | 1.21 (1.00, 1.47)               | 1.52 (1.25, 1.84)               | 1.12E-04               |
|                                   |                     |           | <b>UML</b>          | 0.92 (0.79, 1.08) | 1.15 (0.92, 1.44)               | 1.55 (1.19, 2.01)               | 4.37E-03               |
| rs1818613<br><br>G/T              | <b>PanScan II</b>   | 0.40/0.60 | <b>CML</b>          | 0.86 (0.75, 0.98) | 1.15 (0.99, 1.34)               | 1.38 (1.11, 1.72)               | 1.19E-02               |
|                                   |                     |           | <b>EB</b>           | 0.87 (0.75, 1.00) | 1.15 (0.98, 1.34)               | 1.38 (1.11, 1.72)               | 1.28E-02               |
|                                   |                     |           | <b>UML</b>          | 0.89 (0.77, 1.04) | 1.12 (0.91, 1.39)               | 1.43 (1.03, 1.98)               | 9.32E-02               |
| <i>TMEM163</i><br>(intronic)      | <b>PanScan III</b>  | 0.40/0.60 | <b>CML</b>          | 0.91 (0.80, 1.03) | 1.02 (0.86, 1.20)               | 1.15 (0.91, 1.45)               | 4.78E-01               |
|                                   |                     |           | <b>EB</b>           | 0.91 (0.80, 1.03) | 1.02 (0.86, 1.20)               | 1.15 (0.91, 1.46)               | 4.76E-01               |
|                                   |                     |           | <b>UML</b>          | 0.93 (0.79, 1.09) | 0.99 (0.80, 1.23)               | 1.18 (0.88, 1.59)               | 4.57E-01               |
|                                   | <b>PanC4</b>        | 0.39/0.61 | <b>CML</b>          | 0.85 (0.76,0.94)  | 1.08 (0.98,1.19)                | 1.27 (1.13,1.4)                 | 2.49E-03               |
|                                   |                     |           | <b>EB</b>           | 0.85 (0.76,0.94)  | 1.13 (0.98,1.28)                | 1.28 (1.13,1.43)                | 4.96E-03               |
|                                   |                     |           | <b>UML</b>          | 0.86 (0.75,0.96)  | 1.17 (1.02,1.32)                | 1.32 (1.12,1.53)                | 1.30E-02               |
|                                   | <b>Cohorts</b>      |           | <b>CML</b>          | 0.97 (0.87, 1.08) | 1.08 (0.94, 1.24)               | 1.24 (1.05, 1.47)               | 3.82E-02               |
|                                   |                     |           | <b>EB</b>           | 1.00 (0.88, 1.14) | 0.96 (0.79, 1.16)               | 1.23 (1.03, 1.47)               | 2.76E-02               |
|                                   |                     |           | <b>UML</b>          | 1.03 (0.90, 1.18) | 0.92 (0.77, 1.10)               | 1.18 (0.95, 1.46)               | 7.25E-02               |
|                                   | <b>Case-control</b> |           | <b>CML</b>          | 0.84 (0.79, 0.91) | 1.13 (1.04, 1.23)               | 1.35 (1.21, 1.51)               | 2.18E-07               |
|                                   |                     |           | <b>EB</b>           | 0.85 (0.79, 0.91) | 1.17 (1.07, 1.29)               | 1.37 (1.21, 1.54)               | 3.95E-07               |
|                                   |                     |           | <b>UML</b>          | 0.86 (0.80, 0.94) | 1.18 (1.05, 1.33)               | 1.43 (1.21, 1.68)               | 4.56E-05               |

Abbreviations: Chr, chromosome; BP, base pair position according to the human genome Build 37; A1, effect allele (minor allele); A2, alternative allele (major allele)  
Info, imputation quality score; MAF, minor allele frequency; CML, Constrained maximum-likelihood; EB, Empirical Bayes; UML Unconstrained maximum-likelihood; OR (95%CI), odds ratios and confidence intervals. Case/control counts: PanScan1 1696/1780, PanScan2 1480/1541, PanScan3 1317/5032, PanC4 3949/3673, cohorts 2199/6070, case-control studies 6243/5948.

**Supplementary table 4: Top index SNPs after LD clumping on the meta-analyzed SNPs in regions with suggestive evidence of interaction (empirical Bayes interaction p-value  $\leq 5E-06$ ).**

| CHR     | SNP Position                                                | Effect Allele/Ref Allele | MAF Panc4-PanScan | INFO Panc4-PanScan | OR                |                            |                             | EB Interaction p-value |
|---------|-------------------------------------------------------------|--------------------------|-------------------|--------------------|-------------------|----------------------------|-----------------------------|------------------------|
|         |                                                             |                          |                   |                    | SNP (95% CI)      | SNP*Former Smoker (95% CI) | SNP*Current Smoker (95% CI) |                        |
| 14q22.1 | rs8003600<br>52209869                                       | T/A                      | 0.24-.024         | .94-.93            | 0.87 (0.81, 0.93) | 1.31 (1.18, 1.44)          | 1.04 (0.92, 1.17)           | 2.10E-07               |
| 1q12    | rs3765814<br>241773027<br><i>OPN3</i><br>(intronic)         | T/C                      | 0.17-0.16         | 1-0.75             | 0.90 (0.83, 0.97) | 0.83 (0.74, 0.94)          | .82 (0.70, 0.96)            | 1.90E-06               |
| 16q12.1 | rs78013006<br>11462404<br><i>LOC105371082</i><br>(Intronic) | G/A                      | 0.10-0.10         | .90-.86            | 0.97 (0.87, 1.08) | 0.80 (0.70, 0.92)          | 1.23 (1.05, 1.43)           | 3.53E-06               |

Note: 1000 genome phase 3 was chosen as the reference panel. SNPs in a clump were selected based on a threshold of  $r^2$  equal to 0.05 and a physical distance of 250kb from the index SNPs. Computation was done using plink 1.9.

Supplemental Table 5: Tests of interaction between Established PDAC Risk loci and smoking

| Chr<br>SNP<br>Position <sup>a</sup><br>Gene          | Effect<br>Allele/<br>Ref Allele | MAF<br>PanC4-<br>PanScan | INFO <sup>b</sup><br>PanC4-<br>PanScan | Method<br>GxE | OR SNP<br>(95% CI) | OR SNP*Former<br>Smoker<br>(95% CI) | OR SNP*Current<br>Smoker<br>(95% CI) | Interaction<br>P -value |
|------------------------------------------------------|---------------------------------|--------------------------|----------------------------------------|---------------|--------------------|-------------------------------------|--------------------------------------|-------------------------|
| 1q32.1<br>rs2816938<br>199,985,368<br>NR5A2          | A/T                             | .26-.24                  | .99-.99                                | CML           | 1.19 (1.12-1.27)   | .99 (.91-1.08)                      | 1.05 (.94-1.17)                      | .58                     |
|                                                      |                                 |                          |                                        | UML           | 1.18 (1.08-1.29)   | .98 (.88-1.09)                      | 1.16 (1.01-1.33)                     | .06                     |
|                                                      |                                 |                          |                                        | EB            | 1.19 (1.12-1.27)   | .99 (.90-1.08)                      | 1.09 (.95-1.26)                      | .33                     |
| 1q32.1<br>rs3790844<br>200,007,432<br>NR5A2          | G/A                             | .22- .22                 | 1-1                                    | CML           | .83 (.78-.88)      | .94 (.87-1.03)                      | 1.02 (.92-1.14)                      | .23                     |
|                                                      |                                 |                          |                                        | UML           | .83 (.76-.91)      | .96 (.86-1.08)                      | .99 (.85-1.14)                       | .81                     |
|                                                      |                                 |                          |                                        | EB            | .83 (.78-.89)      | .94 (.86-1.03)                      | 1.01 (.90-1.13)                      | .37                     |
| 2p13.3<br>rs1486134<br>67,639,769<br>ETAA1 2236bp 3' | G/T                             | .289-.286                | 1-1                                    | CML           | .91 (.86-.97)      | .99 (93-1.06)                       | .99 (91-1.08)                        | .97                     |
|                                                      |                                 |                          |                                        | UML           | .89 (.84-.95)      | 1.01 (90-1.12)                      | 1.04 (91-1.20)                       | .80                     |
|                                                      |                                 |                          |                                        | EB            | .91 (.85-.96)      | .99 (91-1.09)                       | 1.00 (90-1.12)                       | .97                     |
| 3q29<br>rs9854771<br>189,508,471<br>TP63             | A/G                             | .344-.354                | 1-.998                                 | CML           | .89 (.84-.95)      | 1.00(.93-1.08)                      | .99 (.90-1.09)                       | .96                     |
|                                                      |                                 |                          |                                        | UML           | .90 (.84-.95)      | .99 (.89-1.09)                      | 1.03 (.91-1.17)                      | .82                     |
|                                                      |                                 |                          |                                        | EB            | .89 (.84-.95)      | 1.00 (.92-1.09)                     | 1.00 (.91-1.11)                      | .99                     |
| 5p15.33<br>rs2736098<br>1,294,086<br>TERT            | T/C                             | .252- .265               | .921-.84                               | CML           | .83 (.78-.88)      | 1.04 (.95-1.13)                     | .96 (.87-1.07)                       | .37                     |
|                                                      |                                 |                          |                                        | UML           | .77 (.70-.84)      | 1.13 (1.02-1.26)                    | 1.10 (.94-1.27)                      | .089                    |
|                                                      |                                 |                          |                                        | EB            | .79 (.73-.87)      | 1.09 (.98-1.21)                     | 1.04 (.89-1.21)                      | .37                     |
| 5p15.33<br>rs401681<br>1,322,087<br>CLPTM1L          | T/C                             | .466-.463                | 1-1                                    | CML           | 1.19 (1.12-1.27)   | .98 (.91-1.05)                      | .97 (.89-1.06)                       | .78                     |
|                                                      |                                 |                          |                                        | UML           | 1.20 (1.13-1.28)   | .97 (.88-1.06)                      | .99 (.88-1.12)                       | .78                     |
|                                                      |                                 |                          |                                        | EB            | 1.19 (1.12-1.27)   | .98 (.91-1.05)                      | 1.00 (.89-1.12)                      | .79                     |
|                                                      | A/C                             | .252-.259                |                                        | CML           | .87 (.82-.93)      | 1.01 (.93-1.09)                     | 1.03 (.93-1.14)                      | .82                     |

|                                                            |     |           |           |     |                  |                 |                 |      |
|------------------------------------------------------------|-----|-----------|-----------|-----|------------------|-----------------|-----------------|------|
| <b>7p13</b><br>rs17688601<br>40,866,663<br>SUGCT           |     |           | 1-1       | UML | .87 (.82-.93)    | 1.00 (.89-1.11) | 1.10 (.96-1.27) | .31  |
|                                                            |     |           |           | EB  | .87 (.82-.93)    | 1.00 (.90-1.10) | 1.06 (.94-1.20) | .55  |
| <b>7p12</b><br>rs73328514<br>47,488,569<br>TNS3            | T/A | .109-.111 | .965-.929 | CML | .83 (.76-.90)    | .98 (.88-1.09)  | 1.01 (.86-1.17) | .93  |
|                                                            |     |           |           | UML | .83 (.74-.92)    | 1.02 (.87-1.18) | 1.04 (.85-1.28) | .91  |
|                                                            |     |           |           | EB  | .83 (.76-.90)    | 1.00 (.88-1.13) | 1.01 (.87-1.18) | .98  |
| <b>7q32.3</b><br>rs6971499<br>130,680,521<br>LINC-PINT     | C/T | .146-.142 | 1- .954   | CML | .84 (.77-.91)    | .98 (.89-1.08)  | .97 (.86-1.11)  | .89  |
|                                                            |     |           |           | UML | .84 (.77-.92)    | .99 (.86-1.13)  | .97 (.81-1.17)  | .96  |
|                                                            |     |           |           | EB  | .84 (.77-.91)    | .98 (.89-1.09)  | .97 (.81-1.17)  | .92  |
| <b>8q21.11</b><br>rs2941471<br>76,470,404<br>HNF4G         | G/A | .419-.418 | .997-.997 | CML | 1.14 (1.07-1.21) | .96 (.90-1.02)  | .88 (.81-.96)   | .026 |
|                                                            |     |           |           | UML | 1.15 (1.08-1.22) | .99 (.90-1.08)  | .88 (.77-.99)   | .11  |
|                                                            |     |           |           | EB  | 1.14 (1.07-1.21) | .96 (.90-1.02)  | .88 (.81-.96)   | .028 |
| <b>8q24.21</b><br>rs10094872<br>128,719,884<br>MYC         | T/A | .371-.375 | .964-.943 | CML | 1.14 (1.07-1.21) | .95 (.88-1.02)  | 1.02 .93-1.12)  | .2   |
|                                                            |     |           |           | UML | 1.12 (1.06-1.20) | .96 (.87-1.06)  | 1.09 (.96-1.24) | .16  |
|                                                            |     |           |           | EB  | 1.14 (1.07-1.21) | .95 (.87-1.03)  | 1.03 (.93-1.15) | .23  |
| <b>8q24.21</b><br>rs1561927<br>129,568,078<br>MIR1208      | C/T | .25-.26   | 1-1       | CML | 1.12 (1.06-1.19) | .99 (.91-1.08)  | .98 (.88-1.09)  | .92  |
|                                                            |     |           |           | UML | 1.12 (1.05-1.19) | 1.00 (.90-1.11) | 1.04 (.91-1.20) | .83  |
|                                                            |     |           |           | EB  | 1.13 (1.06-1.20) | .99 (.90-1.08)  | 1.01 (.89-1.14) | .94  |
| <b>9q34</b><br>rs505922<br>136,149,229<br>ABO              | C/T | .373-.366 | 1-1       | CML | 1.26 (1.18-1.34) | .98 (.91-1.05)  | 1.05 (.96-1.16) | .31  |
|                                                            |     |           |           | UML | 1.23 (1.16-1.31) | 1.02 (.93-1.13) | 1.11 (.98-1.27) | .24  |
|                                                            |     |           |           | EB  | 1.25 (1.18-1.34) | .99 (.91-1.08)  | 1.07 (.95-1.20) | .40  |
| <b>13q12.2</b><br>rs9581943<br>28,493,997<br>PDX1-AS1-PDX1 | A/G | .41-.414  | 1- .987   | CML | 1.16 (1.09-1.23) | 1.01 (.94-1.08) | .98 (.90-1.07)  | .85  |
|                                                            |     |           |           | UML | 1.15 (1.08-1.22) | 1.05 (.96-1.16) | .94 (.83-1.06)  | .19  |
|                                                            |     |           |           | EB  | 1.16 (1.09-1.23) | 1.02 (.94-1.11) | .98 (.88-1.08)  | .68  |



|                                                                                  |     |           |           |     |                  |                 |                  |       |
|----------------------------------------------------------------------------------|-----|-----------|-----------|-----|------------------|-----------------|------------------|-------|
| <b>13q22.1</b><br><b>rs9543325</b><br><b>73,916,628</b><br><b>KLF5 and KLF12</b> | C/T | .409-.391 | 1-1       | CML | 1.29 (1.21-1.37) | .98 (.92-1.05)  | .94 (.86-1.03)   | .43   |
|                                                                                  |     |           |           | UML | 1.27 (1.20-1.36) | 1.04 (.94-1.15) | .91 (.80-1.03)   | .13   |
|                                                                                  |     |           |           | EB  | 1.28 (1.20-1.36) | 1.00 (.92-1.09) | .93 (.84-1.03)   | .33   |
| <b>16q23.1</b><br><b>rs7190458</b><br><b>75,263,661</b><br><b>BCAR1</b>          | A/G | .056-.051 | 1-.739    | CML | 1.51 (1.32-1.74) | .87 (.74-1.03)  | .83 (.67-1.02)   | .13   |
|                                                                                  |     |           |           | UML | 1.50 (1.29-1.75) | .86 (.69-1.08)  | .88 (.65-1.18)   | .40   |
|                                                                                  |     |           |           | EB  | 1.51 (1.31-1.73) | .87 (.73-1.04)  | .86 (.65-1.14)   | .28   |
| <b>17q12</b><br><b>rs4795218</b><br><b>36,078,510</b><br><b>HNF1B</b>            | A/G | .218-.222 | .954-.958 | CML | .88 (.82-.93)    | .97 (.89-1.06)  | .99 (.88-1.10)   | .79   |
|                                                                                  |     |           |           | UML | .90 (.83-.99)    | .93 (.83-1.05)  | .93 (.80-1.08)   | .43   |
|                                                                                  |     |           |           | EB  | .88 (.83-.94)    | .96 (.88-1.06)  | .98 (.85-1.12)   | .73   |
| <b>17q25.1</b><br><b>rs11655237</b><br><b>70,400,166</b><br><b>LINC00673</b>     | T/C | .13-.120  | .955-1    | CML | 1.34 (1.23-1.47) | .88 (.79-.98)   | .83 (.73-.96)    | .013  |
|                                                                                  |     |           |           | UML | 1.32 (1.19-1.47) | .95 (.82-1.09)  | .84 (.70-1.02)   | .21   |
|                                                                                  |     |           |           | EB  | 1.34 (1.23-1.46) | .90 (.79-1.02)  | .84 (.73-.97)    | .038  |
| <b>18q21.32</b><br><b>rs1517037</b><br><b>56,878,274</b><br><b>GRP</b>           | T/C | .177-.182 | 1-1       | CML | .87 (.82-.93)    | 1.03 (.94-1.13) | .96 (.86-1.08)   | .48   |
|                                                                                  |     |           |           | UML | .85 (.78-.93)    | 1.06 (.93-1.20) | 1.01 (.87-1.19)  | .66   |
|                                                                                  |     |           |           | EB  | .86 (.79-.94)    | 1.07 (.96-1.19) | .97 (.85-1.11)   | .31   |
| <b>22q12.1</b><br><b>rs16986825</b><br><b>29,300,306</b><br><b>ZNRF3</b>         | T/C | .165-.158 | 1-.996    | CML | 1.14 (1.04-1.24) | 1.00 (.91-1.10) | 1.20 (1.07-1.36) | .0053 |
|                                                                                  |     |           |           | UML | 1.18 (1.08-1.28) | .96 (.85-1.10)  | 1.06 (.90-1.25)  | .05   |
|                                                                                  |     |           |           | EB  | 1.15 (1.05-1.26) | .99 (.88-1.10)  | 1.12 (.95-1.32)  | .28   |

Abbreviations: Chr:chromosome; MAF:Minor Allele Frequency; GxE: Gene by Environment ; OR 95% CI: Odds Ratio and its 95% confidence interval

- a) SNP position according to NCBI Human Genome Build 37
- b) Quality of imputation metric

**Supplemental table 6. Expression quantitative trait loci (eQTL) for rs1818613 in normal tissues from GTEx8, false discovery rate (FDR) threshold of  $\leq 0.05$**

| SNP Id    | Ref/Effect allele | Gene Symbol | P-Value  | NES#   | Tissue                                |
|-----------|-------------------|-------------|----------|--------|---------------------------------------|
| rs1818613 | G/T               | TMEM163     | 1.20E-27 | 0.55   | Heart - Atrial Appendage              |
| rs1818613 | G/T               | TMEM163     | 1.10E-21 | 0.4    | Whole Blood                           |
| rs1818613 | G/T               | TMEM163     | 3.10E-17 | -0.45  | Testis                                |
| rs1818613 | G/T               | TMEM163     | 7.00E-15 | 0.41   | Esophagus - Muscularis                |
| rs1818613 | G/T               | TMEM163     | 1.80E-11 | 0.28   | Pituitary                             |
| rs1818613 | G/T               | TMEM163     | 3.00E-11 | 0.37   | Artery - Aorta                        |
| rs1818613 | G/T               | CCNT2       | 1.90E-09 | -0.13  | Nerve - Tibial                        |
| rs1818613 | G/T               | TMEM163     | 6.90E-08 | 0.25   | Artery - Tibial                       |
| rs1818613 | G/T               | CCNT2       | 9.40E-08 | -0.14  | Lung                                  |
| rs1818613 | G/T               | TMEM163     | 4.60E-07 | 0.23   | Esophagus - Mucosa                    |
| rs1818613 | G/T               | TMEM163     | 6.50E-07 | 0.28   | Esophagus - Gastroesophageal Junction |
| rs1818613 | G/T               | CCNT2       | 1.30E-06 | -0.12  | Esophagus - Muscularis                |
| rs1818613 | G/T               | TMEM163     | 1.40E-06 | 0.22   | Nerve - Tibial                        |
| rs1818613 | G/T               | TMEM163     | 3.80E-06 | 0.21   | Brain - Frontal Cortex (BA9)          |
| rs1818613 | G/T               | CCNT2       | 1.80E-05 | -0.087 | Thyroid                               |
| rs1818613 | G/T               | TMEM163     | 1.90E-05 | 0.1    | Lung                                  |
| rs1818613 | G/T               | CCNT2-AS1   | 2.30E-05 | 0.41   | Brain - Cerebellar Hemisphere         |
| rs1818613 | G/T               | CCNT2       | 2.70E-05 | -0.097 | Skin - Not Sun Exposed (Suprapubic)   |
| rs1818613 | G/T               | CCNT2       | 4.10E-05 | -0.13  | Heart - Left Ventricle                |
| rs1818613 | G/T               | ZRANB3      | 4.10E-05 | -0.3   | Brain - Hippocampus                   |
| rs1818613 | G/T               | CCNT2       | 4.90E-05 | -0.12  | Heart - Atrial Appendage              |
| rs1818613 | G/T               | CCNT2-AS1   | 4.90E-05 | 0.35   | Brain - Cerebellum                    |
| rs1818613 | G/T               | CCNT2       | 6.10E-05 | -0.15  | Brain - Cortex                        |
| rs1818613 | G/T               | VDAC2P4     | 6.60E-05 | 0.38   | Brain - Cerebellar Hemisphere         |
| rs1818613 | G/T               | CCNT2       | 7.20E-05 | -0.14  | Pituitary                             |
| rs1818613 | G/T               | TMEM163     | 9.50E-05 | 0.19   | Thyroid                               |
| rs1818613 | G/T               | CCNT2       | 1.00E-04 | -0.12  | Testis                                |
| rs1818613 | G/T               | CCNT2       | 2.00E-04 | -0.071 | Artery - Tibial                       |

**# Normal effect size**

The Genotype-Tissue Expression (GTEx) Project was supported by the Common Fund of the Office of the Director of the National Institutes of Health, and by NCI, NHGRI, NHLBI, NIDA, NIMH, and NINDS. The data used for the analyses described in this manuscript were obtained from: the GTEx Portal on 07/30/20.

**Supplemental Table 7: Results of the SNP with the highest CLPP after thresholding CLPP to 0.001. Effect sizes/slope and the p-values are shown based on the eQTL analysis from the GTEx v7 data. Colocalization analysis is performed using eCAVIAR package.**

| SNP ID   | Tissue Name                           | Gene Name      | Ref/Alt Allele | CLPP         | Interaction.EB p-value                   | eQTL Slope    | eQTL p-value                             |
|----------|---------------------------------------|----------------|----------------|--------------|------------------------------------------|---------------|------------------------------------------|
| rs842357 | Adipose Subcutaneous                  | MGAT5          | G/A            | 0.002        | $1.75 \times 10^{-08}$                   | -0.014        | 0.745                                    |
| rs842357 | Artery Tibial                         | MGAT5          | G/A            | 0.002        | $1.75 \times 10^{-08}$                   | -0.011        | 0.716                                    |
| rs842357 | Brain Anterior Cingulate cortex BA24  | TMEM163        | G/A            | 0.031        | $1.75 \times 10^{-08}$                   | -0.204        | 0.023                                    |
| rs842357 | Brain Caudate Basal ganglia           | R3HDM1         | G/A            | 0.002        | $1.75 \times 10^{-08}$                   | -0.005        | 0.912                                    |
| rs842357 | Brain Nucleus Accumbens basal ganglia | CCNT2          | G/A            | 0.002        | $1.75 \times 10^{-08}$                   | 0.124         | 0.033                                    |
| rs842357 | Brain Putamen Basal ganglia           | RAB3GAP1       | G/A            | 0.001        | $1.75 \times 10^{-08}$                   | 0.018         | 0.838                                    |
| rs842357 | Cells EBV-transformed lymphocytes     | ZRANB3         | G/A            | 0.001        | $1.75 \times 10^{-08}$                   | -0.02         | 0.835                                    |
| rs842357 | Cells Transformed fibroblasts         | CCNT2          | G/A            | 0.033        | $1.75 \times 10^{-08}$                   | 0.085         | 0.01                                     |
| rs842357 | <i>Heart Atrial Appendage</i>         | <i>TMEM163</i> | <i>G/A</i>     | <i>0.982</i> | <i><math>1.75 \times 10^{-08}</math></i> | <i>-0.501</i> | <i><math>1.43 \times 10^{-15}</math></i> |
| rs842357 | Liver                                 | MGAT5          | G/A            | 0.001        | $1.75 \times 10^{-08}$                   | 0.037         | 0.599                                    |
| rs842357 | Nerve Tibial                          | TMEM163        | G/A            | 0.002        | $1.75 \times 10^{-08}$                   | -0.184        | 0.002                                    |
| rs842357 | Prostate                              | CCNT2          | G/A            | 0.077        | $1.75 \times 10^{-08}$                   | 0.185         | 0.011                                    |
| rs842357 | Skin Sun Exposed Lower leg            | MGAT5          | G/A            | 0.002        | $1.75 \times 10^{-08}$                   | -0.013        | 0.675                                    |
| rs842357 | Small Intestine Terminal Ileum        | CCNT2          | G/A            | 0.012        | $1.75 \times 10^{-08}$                   | 0.191         | 0.006                                    |
| rs842357 | Stomach                               | TMEM163        | G/A            | 0.032        | $1.75 \times 10^{-08}$                   | -0.104        | 0.008                                    |
| rs842357 | Testis                                | MGAT5          | G/A            | 0.004        | $1.75 \times 10^{-08}$                   | 0.059         | 0.31                                     |
| rs842357 | Vagina                                | ZRANB3         | G/A            | 0.003        | $1.75 \times 10^{-08}$                   | -0.098        | 0.409                                    |

# Co-localization posterior probability

\* Interaction p-value from the empirical Bayes approach
